# Supplementary material
Source: Springer Nature journal article supplement (https://www.springermedizin.de/resource/supplementary/13550_2012_80_MOESM5_ESM.pdf/9687506)

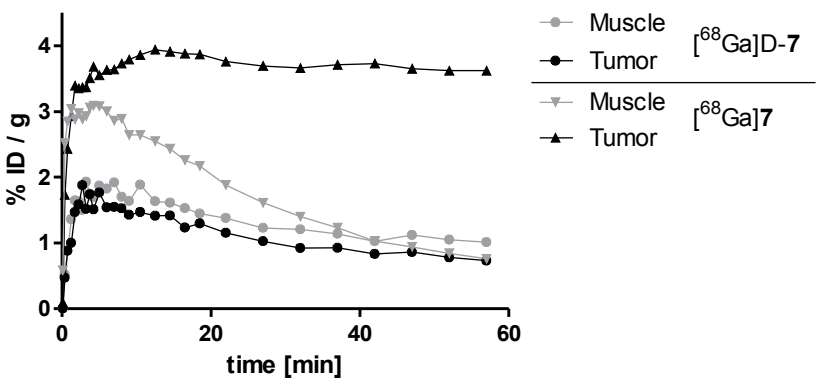

Supplement: MOESM5 [file 9687506]
